# Supplementary material for: A Scoping Review of Preterm Births in Sub-Saharan Africa: Burden, Risk Factors and Outcomes
Source: MDPI journal article supplement (doi:10.3390/ijerph191710537), 2022-08-24
Supplement: s1 [file s1]

**Table S1.** Search String used in the PubMed Database.

(Preterm Birth OR Birth, Preterm OR Births, Preterm OR infants, Premature OR Premature Infant OR Preterm Infant OR Infant, Preterm OR Infants, Preterm OR Preterm Infant OR Premature Infants OR Neonatal Prematurity OR Prematurity, Neonatal) AND ("Africa south of the Sahara" Angola/ OR Benin/ OR Botswana/ OR Burkina Faso/ OR Burundi/ OR Cameroon/ OR cape Verde/ OR central Africa/ OR central African republic/ OR Chad/ OR Comoros/ OR Congo/ OR cote d'ivoire/ OR democratic republic Congo/ OR Djibouti/ OR equatorial guinea/ OR Eritrea/ OR Ethiopia/ OR Gabon/ OR Gambia/ OR Ghana/ OR guinea/ OR Guinea-Bissau/ OR Kenya/ OR Lesotho/ OR Liberia/ OR Madagascar/ OR Malawi/ OR Mali/ OR Mayotte/ OR Mozambique/ OR Namibia/ OR Niger/ OR Nigeria/ OR Rwanda/ OR Sahel/ OR Senegal/ OR Sierra Leone/ OR Somalia/ OR south Africa/ OR south Sudan/ OR Sudan/ OR Swaziland/ OR Tanzania/ OR Togo/ OR Uganda/ OR Zambia/ or Zimbabwe/)

**Table S2.** Characteristics of included studies.

| First author, year         | Country  | Study design    | Population                           | Place of delivery | Sample Size | Measures of gestational age | Prevalence of PTB (%) | Outcomes                                                                                                                                          |
|----------------------------|----------|-----------------|--------------------------------------|-------------------|-------------|-----------------------------|-----------------------|---------------------------------------------------------------------------------------------------------------------------------------------------|
| Abadiga et al., 2021       | Ethiopia | Case control    | General population of pregnant women | Public hospitals  | 516         | LMP, USS                    | NR                    | NR                                                                                                                                                |
| Abaraya et al., 2018       | Ethiopia | Cohort          | General population of pregnant women | Hospital          | 656         | NR                          | 11.8                  | NR                                                                                                                                                |
| Abdo et al., 2020          | Ethiopia | Cross-sectional | General population of pregnant women | Hospital          | 304         | LMP, USS                    | 15.5                  | NR                                                                                                                                                |
| Abdul-mumin et al., 2020   | Ghana    | Cohort          | Preterm babies admitted              | Hospital          | 192         | NR                          | NR                    | -Participants were hospitalized preterm babies.<br>-39.3% of these babies died.<br>-87.0% of extremely preterm babies died during hospitalization |
| Abebe et al., 2020         | Ethiopia | Cohort          | Teenage pregnant women               | Hospital          | 309         | NR                          | 12.9                  | NR                                                                                                                                                |
| Abrams et al., 2004        | Malawi   | Cross-sectional | General population of pregnant women | Hospital          | 572         | Ballard score               | 8.2                   | NR                                                                                                                                                |
| Adam et al., 2009          | Sudan    | Cross-sectional | General population of pregnant women | Hospital          | 644         | LMP, USS                    | 4.5                   | NR                                                                                                                                                |
| Adane et al., 2014         | Ethiopia | Cross-sectional | General population of pregnant women | Hospital          | 490         | LMP, USS                    | 14.3                  |                                                                                                                                                   |
| Adeniran et al., 2014      | Nigeria  | Case control    | HIV positive pregnant women          | Hospital          | 268         | NR                          | 7.8                   |                                                                                                                                                   |
| Adesina et al., 2015       | Nigeria  | Cross-sectional | HIV positive pregnant women          | Hospital          | 307         | NR                          | 35.8                  |                                                                                                                                                   |
| Adu-Bonsaffoh et al., 2019 | Ghana    | Cohort          | General population of pregnant women | Hospital          | 7801        | LMP                         | 18.9                  | -Premature babies were more likely to be stillbirths, have poor APGAR score, and be admitted to NICU                                              |
| Agbeno et al., 2021        | Ghana    | Cohort          | Hospitalized preterm babies          | Hospital          | 27,320      | NR                          | 4.7                   | -Participants were hospitalized preterm babies.<br>-27.6% of preterm infants died.                                                                |

|                       |              |                 |                                      |                                 |        |               |                                                                                                                                                                          |                                                                                                                                                                                                                                               |
|-----------------------|--------------|-----------------|--------------------------------------|---------------------------------|--------|---------------|--------------------------------------------------------------------------------------------------------------------------------------------------------------------------|-----------------------------------------------------------------------------------------------------------------------------------------------------------------------------------------------------------------------------------------------|
|                       |              |                 |                                      |                                 |        |               |                                                                                                                                                                          | -Survival depended on birth weight (p <0.001); gestational age (p <0.001); mode and place of delivery (p <0.001 for both); APGAR scores at 1 <sup>st</sup> and 5 <sup>th</sup> minutes (p <0.001), and length of stay at the SCBU (p <0.001). |
| Agbla et al., 2006    | Benin        | Case control    | General population of pregnant women | Hospital                        | 203    | LMP, USS      | NR                                                                                                                                                                       | NR                                                                                                                                                                                                                                            |
| Akintayo et al., 2015 | Nigeria      | Case control    | General population of pregnant women | Hospital                        | 4347   | LMP           | 6.0                                                                                                                                                                      | -Premature babies were more likely to be admitted to special baby care units, have poor APGAR scores, and had higher perinatal mortality                                                                                                      |
| Akintije et al., 2020 | Rwanda       | Cross-sectional | General population of pregnant women | Hospital                        | 4960   | LMP           | 9.9 overall, 21.6 among those with one ANC visit, 22.3 among those with two ANC visits, 17.5 among those with three ANC visits, and 5.6 among those with four ANC visits | NR                                                                                                                                                                                                                                            |
| Alhaj et al., 2010    | Sudan        | Case control    | General population of pregnant women | Hospital                        | 3240   | LMP, USS      | 3.8                                                                                                                                                                      | NR                                                                                                                                                                                                                                            |
| Aniji et al., 2012    | South Africa | Cohort          | HIV positive pregnant women          | Hospital                        | 245    | USS           | 23.2                                                                                                                                                                     | NR                                                                                                                                                                                                                                            |
| Anthony et al., 2020  | Malawi       | Cross-sectional | General population of pregnant women | Health facilities and community | 14,792 | LMP, USS, SFH | 19.3                                                                                                                                                                     | NR                                                                                                                                                                                                                                            |
| Aregawi et al., 2019  | Ethiopia     | Cross-sectional | General population of pregnant women | Hospital                        | 472    | LMP           | 13.3                                                                                                                                                                     | NR                                                                                                                                                                                                                                            |
| Asefa et al., 2020    | Ethiopia     | Cross-sectional | General population of pregnant women | Hospital                        | 752    | NR            | 6.9 overall<br>11.2 among advanced-aged mothers                                                                                                                          | NR                                                                                                                                                                                                                                            |

|                       |                                              |                 |                                       |           |        |                         |                                                                                               |                                                                                |
|-----------------------|----------------------------------------------|-----------------|---------------------------------------|-----------|--------|-------------------------|-----------------------------------------------------------------------------------------------|--------------------------------------------------------------------------------|
|                       |                                              |                 |                                       |           |        |                         | 2.6 among younger-aged mothers                                                                |                                                                                |
| Aseidu et al., 2019   | Ghana                                        | Case control    | General population of pregnant women  | Hospital  | 390    | NR                      | NR                                                                                            | NR                                                                             |
| Bako et al., 2009     | Nigeria                                      | Cohort          | General population of pregnant women  | Hospital  | 400    | NR                      | 7.0                                                                                           | NR                                                                             |
| Bako et al, 2017      | Nigeria                                      | Case control    | Preterm babies admitted               | Hospital  | 379    | LMP, USS                | NR                                                                                            | -Participants were hospitalized preterm babies.<br>-19.6% of these babies died |
| Balkus et al., 2021   | Malawi<br>South Africa<br>Uganda<br>Zimbabwe | Cross-sectional | General population of pregnant women  | Hospitals | 10,138 | LMP, USS, SFH           | 13.0 overall<br>10.7 in Malawi<br>20.7 in South Africa<br>10.4 in Uganda,<br>11.7 in Zimbabwe | NR                                                                             |
| Bater et al., 2020    | Uganda                                       | Cohort          | General population of pregnant women  | NR        | 3841   | LMP                     | 19.4                                                                                          | NR                                                                             |
| Bello et al.,2019     | Nigeria                                      | Cohort          | Hospitalized preterm babies           | Hospital  | 3435   | LMP, USS, Ballard Score | 32.9                                                                                          | -Participants were hospitalized preterm babies.<br>-14.7% of these babies died |
| Berhane et al., 2019  | Ethiopia                                     | Cohort          | General population of pregnant women  | Hospital  | 1486   | LMP, USS, Ballard Score | 10.2                                                                                          |                                                                                |
| Berhanie et al., 2019 | Ethiopia                                     | Case control    | General population of pregnant women  | Hospital  | 954    | NR                      | NR                                                                                            | NR                                                                             |
| Berhe et al., 2019    | Ethiopia                                     | Cohort          | Mothers with PIH and comparison peers | Hospital  | 782    | NR                      | 40.8 among mothers with PIH,<br>5.6 among normotensive mothers                                | NR                                                                             |

|                       |                   |                 |                                              |                   |      |               |                                                                                             |                                                                                                                                                                                                                                                                                            |
|-----------------------|-------------------|-----------------|----------------------------------------------|-------------------|------|---------------|---------------------------------------------------------------------------------------------|--------------------------------------------------------------------------------------------------------------------------------------------------------------------------------------------------------------------------------------------------------------------------------------------|
| Berhe, 2019, Ethiopia | Ethiopia          | Cross-sectional | General population of pregnant women         | Hospitals         | 413  | NR            | 12.8                                                                                        | NR                                                                                                                                                                                                                                                                                         |
| Bisio et al., 2015    | Republic of Congo | Cohort          | HIV Positive pregnant women                  | Health centres    | 188  | LMP, USS      | 10.7                                                                                        | NR                                                                                                                                                                                                                                                                                         |
| Brabin et al., 2019   | Burkina Faso      | RCT             | Nulliparous women                            | Health centres    | 286  | USS           | 27.5 among cases<br>13.9 among controls                                                     | NR                                                                                                                                                                                                                                                                                         |
| Brhane et al., 2019   | Ethiopia          | Cohort          | General population of pregnant women         | Health facilities | 460  | LMP           | 10.4 overall<br>25.9 among mothers with short IPI<br>2.9 among mothers with recommended IPI | NR                                                                                                                                                                                                                                                                                         |
| Brink et al., 2020    |                   | Cohort          | General population of pregnant women         | Clinics           | 5806 | LMP           | 13.3                                                                                        | NR                                                                                                                                                                                                                                                                                         |
| Brits et al., 2015    | South Africa      | Case control    | General population of pregnant women         | Hospital          | 198  | LMP           | NR                                                                                          | NR                                                                                                                                                                                                                                                                                         |
| Brittain et al., 2015 | South Africa      | Cohort          | General population of pregnant women         | Clinics           | 726  | USS, SFH      | 15.0                                                                                        | NR                                                                                                                                                                                                                                                                                         |
| Butali et al., 2016   | Nigeria           | Cross-sectional | General population of pregnant women         | Hospital          | 4691 | LMP, USS      | 16.8                                                                                        | NR                                                                                                                                                                                                                                                                                         |
| Chen et al., 2012     | Botswana          | Cohort          | HIV positive pregnant women                  | Hospitals         | 9504 | LMP           | 19.6                                                                                        | NR                                                                                                                                                                                                                                                                                         |
| Chetty et al., 2018   | South Africa      | Cohort          | HIV Positive pregnant women                  | Clinics           | 2549 | LMP, USS, SFH | 10.4                                                                                        | NR                                                                                                                                                                                                                                                                                         |
| Chiabi et al., 2013   | Cameroon          | Cross-sectional | Preterm babies admitted and comparison peers | Hospital          | 1066 | LMP           | 26.5                                                                                        | -Participants were hospitalized preterm babies and comparison peers.<br>-36.6% of preterm babies died, in which 69% occurred in the early neonatal period.<br>-The main causes of death were neonatal infections (27.6%), neonatal asphyxia (11.9%) and congenital malformations (10.3%) . |

|                          |               |                 |                                                          |                   |        |                    |                                                                 |    |
|--------------------------|---------------|-----------------|----------------------------------------------------------|-------------------|--------|--------------------|-----------------------------------------------------------------|----|
| Conroy et al., 2017      | Uganda        | RCT             | HIV Positive pregnant women                              | Clinics           | 326    | LMP, USS           | 16.9                                                            | NR |
| Dadabhai et al., 2019    | Malawi        | Cohort          | General population of pregnant women                     | Health facilities | 1299   | LMP, Ballard score | 10.6 among HIV infected women<br>9.5 among HIV uninfected women | NR |
| Dadi et al., 2020        | Ethiopia      | Cohort          | General population of pregnant women                     | NR                | 916    | LMP, USS           | 16.4                                                            | NR |
| D'Cruz et al., 2012      | Tanzania      | Case control    | General population of pregnant women                     | Hospital          | 188    | LMP                | 26.1                                                            | NR |
| De Beaudrap et al., 2013 | Uganda        | Cohort          | General population of pregnant women                     | Hospital          | 1218   | USS, SFH           | 7.0                                                             | NR |
| Debelo et al., 2020      | Ethiopia      | Cohort          | Pregnant mothers with advanced age                       | Hospital          | 907    | NR                 | 19.8                                                            | NR |
| Deressa et al., 2018     | Ethiopia      | Cross-sectional | Babies admitted                                          | Hospital          | 23,115 | NR                 | 16.5                                                            | NR |
| Dettinger et al., 2019   | Kenya         | Case control    | Mothers with prenatal PrEP exposure and comparison peers | Health clinics    | 1530   | LMP                | 3.4 among mothers with PrEP exposure, 6.9 among controls        | NR |
| Egbe et al., 2015        | Cameroon      | Cross-sectional | Adolescent pregnant women                                | Hospital          | 148    | LMP                | 13.0                                                            | NR |
| Ejigu et al., 2019       | Ethiopia      | Cohort          | HIV Positive pregnant women on ART                       | Hospital          | 1663   | LMP, USS, SFH      | 16.6                                                            | NR |
| Elphinstone et al., 2019 | Malawi        | Cohort          | HIV negative women                                       | Hospital          | 1506   | USS                | 20.2                                                            | NR |
| Ekouevi et al., 2011     | Côte d'Ivoire | Cohort          | HIV Positive pregnant women                              | NR                | 344    | LMP, USS           | 11.0                                                            | NR |
| Etuk et al., 2005        | Nigeria       | Cross-sectional | General population of pregnant women                     | Hospital          | 2640   | NR                 | 9.0                                                             | NR |
| Ezechi et al., 2012      | Nigeria       | Cohort          | HIV positive pregnant women                              | Hospital          | 1626   | LMP                | 11.0                                                            | NR |

|                              |            |                 |                                      |                               |        |                         |      |                                                                                                                                                                                                                                                                             |
|------------------------------|------------|-----------------|--------------------------------------|-------------------------------|--------|-------------------------|------|-----------------------------------------------------------------------------------------------------------------------------------------------------------------------------------------------------------------------------------------------------------------------------|
| Ezegwui et al., 2012         | Nigeria    | Case control    | General population of pregnant women | Hospital                      | 179    | LMP                     | 17.0 | NR                                                                                                                                                                                                                                                                          |
| Ezenwa et al., 2021          | Nigeria    | Cross-sectional | General population of pregnant women | Both home and health facility | 628    | Ballard score           | 29.3 | NR                                                                                                                                                                                                                                                                          |
| Fajolu et al., 2019          | Nigeria    | Cohort          | General population of pregnant women | Hospital                      | 11,607 | LMP, USS, Ballard Score | 14.5 | -Target participants were hospitalized extremely preterm babies.<br>-75.7% of these babies died                                                                                                                                                                             |
| Fawcus et al., 1992          | Zimbabwe   | Case control    | General population of pregnant women | Hospital                      | 380    | NR                      | 25.0 | NR                                                                                                                                                                                                                                                                          |
| Fawzi et al., 1998           | Tanzania   | RCT             | HIV positive pregnant women          | Hospital                      | 888    | LMP                     | 23.0 | NR                                                                                                                                                                                                                                                                          |
| Fawzi et al., 2007           | Tanzania   | RCT             | HIV negative pregnant women          | Hospital                      | 8468   | LMP                     | 17.0 | NR                                                                                                                                                                                                                                                                          |
| Fennell et al., 2021         | Botswana   | Cohort          | HIV positive pregnant women          | Hospital                      | 8867   | LMP, USS                | 21.6 | NR                                                                                                                                                                                                                                                                          |
| Feresu et al., 2010          | Zimbabwe   | Cohort          | General population of pregnant women | Hospital                      | 17,174 | LMP                     | 22.0 | NR                                                                                                                                                                                                                                                                          |
| Feresu et al., 2004          | Zimbabwe   | Case control    | General population of pregnant women | Hospital                      | 3103   | Ballard score           | 16.0 | NR                                                                                                                                                                                                                                                                          |
| Fouelifack et al., 2014      |            | Cross-sectional | General population of pregnant women | Hospital                      | 4032   | NR                      | 25.0 | NR                                                                                                                                                                                                                                                                          |
| Garcia-Basteiro et al., 2017 | Mozambique | Cohort          | General population of pregnant women | Hospital                      | 5574   | Ballard score, Dubowitz | 6.2  | -Neonatal and infant mortality rate for preterm babies was 980.2/ 1000 and 136.1/1000 children years at risk, respectively<br>-Preterm babies had 13 times higher risk of mortality compared to 5 times in term babies<br>-Risk of hospitalization higher in preterm babies |
| Gejo et al., 2021            | Ethiopia   | Case control    | General population of pregnant women | Hospital                      | 213    | LMP, USS                | NR   | NR                                                                                                                                                                                                                                                                          |

|                        |                    |                 |                                                |                          |        |               |      |                                                                                                                                                                                                                                                                                                                                                                                                                                                                                                                                                                                                                                                                         |
|------------------------|--------------------|-----------------|------------------------------------------------|--------------------------|--------|---------------|------|-------------------------------------------------------------------------------------------------------------------------------------------------------------------------------------------------------------------------------------------------------------------------------------------------------------------------------------------------------------------------------------------------------------------------------------------------------------------------------------------------------------------------------------------------------------------------------------------------------------------------------------------------------------------------|
| Gesase et al., 2018    | Tanzania           | Cross-sectional | General population of pregnant women           | Hospital                 | 1117   | NR            | 14.0 | NR                                                                                                                                                                                                                                                                                                                                                                                                                                                                                                                                                                                                                                                                      |
| Gibango et al., 2018   | South Africa       | Cross-sectional | HIV positive women on antiretroviral treatment | Hospital                 | 496    | Ballard score | 32.0 | NR                                                                                                                                                                                                                                                                                                                                                                                                                                                                                                                                                                                                                                                                      |
| Gibb et al., 2012      | Zimbabwe<br>Uganda | RCT             | HIV positive pregnant women                    | Hospital                 | 226    | LMP           | 10.0 | NR                                                                                                                                                                                                                                                                                                                                                                                                                                                                                                                                                                                                                                                                      |
| Gladstone et al., 2011 | Malawi             | Cohort          | General population of pregnant women           | 65.5% in health facility | 840    | USS           | NR   | <p>-Greater risk of death among preterm babies during the postnatal period (HR1.8, 1.1-3.0).</p> <p>- Surviving preterm infants were more likely to be underweight (weight-for-age z score; <math>p&lt;0.001</math>) or wasted (weight-for-length z score; <math>p&lt;0.01</math>).</p> <p>- Preterm infants more often screened positively for disability on the Ten Question Questionnaire (<math>p=0.002</math>).</p> <p>- They also had higher rates of developmental delay on the Malawi Developmental Assessment Tool at 18 months (<math>p=0.009</math>).</p> <p>-Morbidity (hospital visits and hospitalizations) were similar for preterm and term babies.</p> |
| Govender et al., 2018  | South Africa       | Cross-sectional | Adolescent pregnant women                      | Hospital                 | 314    | NR            | 6.0  | NR                                                                                                                                                                                                                                                                                                                                                                                                                                                                                                                                                                                                                                                                      |
| Gumede et al., 2017    | South Africa       | Cross-sectional | General population of pregnant women           | Hospital                 | 31,179 | NR            | 17.0 | NR                                                                                                                                                                                                                                                                                                                                                                                                                                                                                                                                                                                                                                                                      |
| Habib et al., 2008     | Tanzania           | Cohort          | General population of pregnant women           | Hospital                 | 14,444 | LMP           | 9.0  | NR                                                                                                                                                                                                                                                                                                                                                                                                                                                                                                                                                                                                                                                                      |
| Harjunmaa et al., 2015 | Malawi             | Cross-sectional | General population of pregnant women           | Home and health facility | 1024   | USS           | 8.0  | NR                                                                                                                                                                                                                                                                                                                                                                                                                                                                                                                                                                                                                                                                      |
| Hassen et al., 2021    | Ethiopia           | Case control    | General population of pregnant women           | Hospital                 | 365    | LMP, USS      | 24.9 | NR                                                                                                                                                                                                                                                                                                                                                                                                                                                                                                                                                                                                                                                                      |



|                      |              |                 |                                                |                 |        |                         |      |                                                                                                                                                                                                                                                                                                                                                                                        |
|----------------------|--------------|-----------------|------------------------------------------------|-----------------|--------|-------------------------|------|----------------------------------------------------------------------------------------------------------------------------------------------------------------------------------------------------------------------------------------------------------------------------------------------------------------------------------------------------------------------------------------|
| Hoque et al., 2014   | South Africa | Cohort          | General population of pregnant women           | Health facility | 2325   | NR                      | 16.0 | NR                                                                                                                                                                                                                                                                                                                                                                                     |
| Hussain et al., 2011 | South Africa | Cross-sectional | General population of pregnant women           | Hospital        | 1622   | Ballard score           | 22.0 | NR                                                                                                                                                                                                                                                                                                                                                                                     |
| Hussein et al., 2009 | Tanzania     | Cross-sectional | General population of pregnant women           | Hospital        | 1721   | LMP, USS                | 17.0 | NR                                                                                                                                                                                                                                                                                                                                                                                     |
| Hussein et al., 2020 | Ghana        | Cohort          | General population of pregnant women           | Hospital        | 1323   | NR                      | 36.4 | NR                                                                                                                                                                                                                                                                                                                                                                                     |
| Iyoke et al., 2015   | Nigeria      | Cohort          | General population of pregnant women           | Hospital        | 784    | LMP                     | 17.0 | -Survival to discharge rate of preterm babies 38.4% compared to 88.2% for term babies.<br>-Babies born via Vaginal delivery, extreme and very preterm babies had decreased odds of survival.<br>-294 preterm babies were admitted compared to 34 term babies.<br>- The mean duration of admission for singleton preterm babies was 16±5.8 days compared to 5±3.4 days for term babies. |
| Johnson et al., 2016 | Botswana     | Cohort          | General population of pregnant women           | Hospital        | 14,170 | LMP                     | 16.0 | NR                                                                                                                                                                                                                                                                                                                                                                                     |
| Kalanda et al., 2006 | Malawi       | Cross-sectional | General population of pregnant women           | Hospital        | 1571   | Ballard score, Dubowitz | 17.3 | NR                                                                                                                                                                                                                                                                                                                                                                                     |
| Kalengo et al., 2020 | Tanzania     | Cohort          | Women with two consecutive singleton births    | NR              | 5946   | NR                      | 11.0 | NR                                                                                                                                                                                                                                                                                                                                                                                     |
| Kamfwa et al., 2017  | Zambia       | Case control    | Preterm neonates who died and comparison peers | Hospital        | 208    | NR                      | NR   | -Outcome was early neonatal death and its predictors. LBW was a major predictor of Preterm early neonatal death (aOR132, 39.5-387.7)                                                                                                                                                                                                                                                   |
| Kassa et al., 2019   | Ethiopia     | Cohort          | General population of pregnant women           | Hospital        | 1134   | NR                      | 10.0 | NR                                                                                                                                                                                                                                                                                                                                                                                     |

|                       |                              |                 |                                         |                                   |        |                         |                                                              |                                                                                                                                                                                                                                                              |
|-----------------------|------------------------------|-----------------|-----------------------------------------|-----------------------------------|--------|-------------------------|--------------------------------------------------------------|--------------------------------------------------------------------------------------------------------------------------------------------------------------------------------------------------------------------------------------------------------------|
| Kelkay et al., 2018   | Ethiopia                     | Cross-sectional | General population of pregnant women    | NR                                | 325    | LMP, USS                | 17.0                                                         | NR                                                                                                                                                                                                                                                           |
| Kigozi et al., 2003   | Uganda                       | RCT             | Pregnant women with <i>T. vaginalis</i> | Hospita                           | 277    | LMP, Ballard score      | 21.0                                                         | NR                                                                                                                                                                                                                                                           |
| Kilewo et al., 200    | Tanzania<br>Malawi<br>Zambia | Cohort          | HIV Positive pregnant women             | Hospital                          | 2126   | SFH                     | 26.0                                                         | NR                                                                                                                                                                                                                                                           |
| Kongnyuy et al., 2008 | Cameroon                     | Cross-sectional | General population of pregnant women    | Hospital                          | 1100   | NR                      | 15.0                                                         | NR                                                                                                                                                                                                                                                           |
| Koss et al., 2014     | Uganda                       | RCT             | HIV Positive pregnant women             | Hospital                          | 356    | LMP, USS                | 15.0                                                         | NR                                                                                                                                                                                                                                                           |
| Kumwenda et al., 2017 | Zambia                       | Cross-sectional | Adolescent pregnant women               | Hospital                          | 200    | NR                      | NR                                                           | NR                                                                                                                                                                                                                                                           |
| Kuti et al., 2003     | Nigeria                      | Cohort          | General population of pregnant women    | Hospital                          | 3777   | LMP, USS, Ballard score | 13.0                                                         | -Neonatal mortality rate among term and preterm babies was 3/1000 and 178/1000 children years at risk, respectively.<br>-All extreme preterm babies died.<br>-Major causes of death were RDS (50%), infection (20%), birth asphyxia (15%) and jaundice (10%) |
| Laelago et al., 2017  | Ethiopia                     | Cross-sectional | General population of pregnant women    | Public health facility            | 183    | NR                      | NR                                                           | NR                                                                                                                                                                                                                                                           |
| Letamo et al., 2001   | Botswana                     | Cohort          | General population of pregnant women    | Health facility                   | 7265   | LMP                     | 18.0                                                         | NR                                                                                                                                                                                                                                                           |
| Li et al., 2016       | Tanzania                     | Cohort          | HIV positive pregnant women             | NR                                | 3314   | LMP                     | 29.0                                                         | NR                                                                                                                                                                                                                                                           |
| Magadi et al., 2006   | Kenya                        | Cross-sectional | Pregnant adolescent girls               | Health facility and home delivery | 269    | LMP                     | 41.7 among urban adolescents<br>49.4 among rural adolescents | NR                                                                                                                                                                                                                                                           |
| Mahande et al., 2016  | Tanzania                     | Cohort          | General population of pregnant women    | Hospital                          | 17,030 | LMP                     | 10.0                                                         | NR                                                                                                                                                                                                                                                           |

|                        |              |                 |                                      |                     |        |               |                                       |    |
|------------------------|--------------|-----------------|--------------------------------------|---------------------|--------|---------------|---------------------------------------|----|
| Mahande et al., 2013   | Tanzania     | Cohort          | General population of pregnant women | Hospital            | 3909   | LMP           | 11.0                                  | NR |
| Mahande et al., 2013   | Tanzania     | Cohort          | Primiparous women                    | Hospital            | 3359   | LMP           | 14.0                                  | NR |
| Mahande et al., 2016   | Tanzania     | Cross-sectional | General population of pregnant women | Hospital            | 3,0797 | LMP           | 10.0                                  | NR |
| Mahapula et al., 2016  | Tanzania     | Case control    | General population of pregnant women | Hospital            | 754    | NR            | NR                                    | NR |
| Malaba et al., 2018    | South Africa | Cohort          | General population of pregnant women | Hospital            | 1787   | LMP, USS, SFH | 36.0 by LMP, 17.0 by SFH, 11.0 by USS | NR |
| Malaba et al., 2017    | South Africa | Cohort          | General population of pregnant women | Hospital            | 1554   | LMP, USS, SFH | 21.0                                  | NR |
| Malaba et al., 2020    | South Africa | Cohort          | General population of pregnant women | Hospital            | 1583   | LMP, USS, SFH | 18.0                                  | NR |
| Mashau et al., 2020    | South Africa | Cohort          | General population of pregnant women | NR                  | 198    | LMP           | 9.7                                   | NR |
| Maymunah et al., 2014  | Nigeria      | Cohort          | General population of pregnant women | Hospital            | 320    | LMP, USS      | 8.0                                   | NR |
| Mboya et al., 2021     | Tanzania     | Cohort          | General population of pregnant women | Hospital            | 44,117 | LMP           | 11.7                                  | NR |
| Mehari et al., 2020    | Ethiopia     | Cross-sectional | General population of pregnant women | Hospital            | 752    | NR            | 7.0                                   | NR |
| Mekonen et al., 2019   | Ethiopia     | Cross-sectional | General population of pregnant women | Health institutions | 575    | LMP, USS      | 13.0                                  | NR |
| Mekuriyaw et al., 2020 | Ethiopia     | Case control    | General population of pregnant women | Hospital            | 405    | LMP, USS      | NR                                    | NR |
| Mochache et al., 2018  | Kenya        | Cohort          | General population of pregnant women | NR                  | 255    | LMP, USS, SFH | 11.0                                  | NR |

|                          |                                          |                 |                                      |                            |        |                         |      |                                                                                                                                                                                                                                                                                                                                                                                                                                                   |
|--------------------------|------------------------------------------|-----------------|--------------------------------------|----------------------------|--------|-------------------------|------|---------------------------------------------------------------------------------------------------------------------------------------------------------------------------------------------------------------------------------------------------------------------------------------------------------------------------------------------------------------------------------------------------------------------------------------------------|
| Mokuolu et al., 2002     | Nigeria                                  | Case control    | General population of pregnant women | Hospital                   | 171    | LMP, USS, Ballard score | NR   | NR                                                                                                                                                                                                                                                                                                                                                                                                                                                |
| Mombo-ngoma et al., 2016 | Benin<br>Gabon<br>Mozambique<br>Tanzania | Cohort          | General population of pregnant women | Hospital                   | 4100   | Ballard score           | 4.0  | NR                                                                                                                                                                                                                                                                                                                                                                                                                                                |
| Moodley et al., 2017     | South Africa                             | Cohort          | General population of pregnant women | NR                         | 615    | LMP, USS                | 18.0 | NR                                                                                                                                                                                                                                                                                                                                                                                                                                                |
| Muhayimana et al., 2017  | Rwanda                                   | Cohort          | Preterm babies admitted              | Hospital                   | 125    | NR                      | NR   | <p>-All the participants were preterm babies admitted neonatal intensive care unit</p> <p>-Mortality rate was high (75%, 25%, and 2% for severe, moderate, and late preterm babies, respectively).</p> <p>-The main morbidities were neonatal sepsis (88.8%), and RDS (62.4%), neonatal jaundice (21.6%) and asphyxia (17.6%)</p> <p>-Morbidities and mortality was high as gestational age and birth weight decreased.</p>                       |
| Muhe et al., 2019        | Ethiopia                                 | Cross-sectional | Preterm babies admitted              | Hospital                   | 4919   | LMP, USS, Ballard score | NR   | <p>-78.3% of preterm babies were admitted.</p> <p>-28.8% of admitted babies died compared to 0.7% in those not admitted.</p> <p>-22.7% of preterm babies died, 89% of these deaths were for extremely preterm babies</p> <p>-Causes of death were RDS (45%), neonatal infection (30%), combined sepsis, pneumonia, meningitis and birth asphyxia (14%).</p> <p>-Hypothermia was the most common contributory cause of preterm mortality (69%)</p> |
| Muhihi et al., 2016      | Tanzania                                 | Cohort          | General population of pregnant women | Hospital and home delivery | 19,269 | LMP                     | 16.0 | NR                                                                                                                                                                                                                                                                                                                                                                                                                                                |

|                         |                     |                 |                                      |          |      |                         |                                      |                                                                                                                                                                                                                   |
|-------------------------|---------------------|-----------------|--------------------------------------|----------|------|-------------------------|--------------------------------------|-------------------------------------------------------------------------------------------------------------------------------------------------------------------------------------------------------------------|
| Muhumed et al., 2021    | Ethiopia            | Cross-sectional | General population of pregnant women | Hospital | 600  | LMP, USS                | 12.0                                 | NR                                                                                                                                                                                                                |
| Muti et al, 2015        | Zimbabwe            | Cross-sectional | General population of pregnant women | Hospital | 289  | NR                      | 9.0                                  | NR                                                                                                                                                                                                                |
| Muwazi et al., 2014     | Uganda              | Cross-sectional | General population of pregnant women | Hospital | 400  | SFH                     | 13.0                                 | NR                                                                                                                                                                                                                |
| Naidoo et al., 2016     | South Africa        | Cohort          | General population of pregnant women | Hospital | 250  | LMP, USS, SFH           | 9.0                                  | NR                                                                                                                                                                                                                |
| Namazzi et al., 2020    | Uganda              | Cohort          | Preterm babies admitted              | Hospital | 454  | Ballard score           | NR                                   | -High incidence of neurodevelopmental disorders among preterm infants (20.4%) compared to term infants (7.5%).<br>-High prevalence of malnutrition among preterm infants (18.6%) compared to term infants (2.1%). |
| N'Dao et al., 2006      | Senegal             | Cross-sectional | General population of pregnant women | NR       | 8273 | LMP                     | 18.0                                 | NR                                                                                                                                                                                                                |
| Ngandu et al., 2021     | DRC<br>South Africa | Cross-sectional | General population of pregnant women | Hospital | 1084 | NR                      | 17.1 in DRC,<br>11.5 in South Africa | NR                                                                                                                                                                                                                |
| Njim et al., 2016       | Cameroon            | Cross-sectional | General population of pregnant women | Hospital | 4941 | NR                      | 10.0                                 | NR                                                                                                                                                                                                                |
| Njom Nlend et al., 2016 | Cameroon            | Cross-sectional | HIV positive pregnant women          | NR       | 762  | LMP, SFH, USS           | 9.0                                  | NR                                                                                                                                                                                                                |
| Nkyekyer et al., 2002   | Ghana               | Cohort          | General population of pregnant women |          | 1869 | LMP, USS                | 14.0                                 | NR                                                                                                                                                                                                                |
| Nkyekyer et al., 2006   | Ghana               | Cohort          | General population of pregnant women | Hospital | 4731 | LMP, USS, Ballard score | 9.0                                  | NR                                                                                                                                                                                                                |
| Noble et al., 2005      | Mozambique          | Cross-sectional | General population of pregnant women | Hospital | 497  | NR                      | 11.0                                 | NR                                                                                                                                                                                                                |
| Ojule et al., 2011      | Nigeria             | Case control    | Primigravidae pregnant women         | Hospital | 1589 | NR                      | 5.0                                  | NR                                                                                                                                                                                                                |

|                         |              |                 |                                      |                            |        |                    |      |                                                                                                                                                                                                                                                                                                                                                                                                                                               |
|-------------------------|--------------|-----------------|--------------------------------------|----------------------------|--------|--------------------|------|-----------------------------------------------------------------------------------------------------------------------------------------------------------------------------------------------------------------------------------------------------------------------------------------------------------------------------------------------------------------------------------------------------------------------------------------------|
| Okwako et al., 2017     | Kenya        | Cohort          | Preterm babies admitted              | Health facilities and home | 175    | NR                 | NR   | <ul style="list-style-type: none"> <li>-Mortality rate among preterm infants was 39.4%.</li> <li>-Mortality rates were 70.4% for infants born &lt;28 weeks, 50% for those born between 28 and 31 weeks and 24.5% for those born above 32 weeks.</li> <li>-Predictors of mortality were GA&gt;32 weeks (aHR0.4, 0.2-0.8), Emergency CS (aHR4.3, 1.9-9.7), Birthweight &gt; 1000 (aHR0.3, 0.1-0.6), ANC attendance (aHR0.5, 0.3-0.9)</li> </ul> |
| Oluwafemi et al., 2016  | Nigeria      | Cross-sectional | General population of pregnant women | Hospital                   | 10,432 | LMP, Ballard Score | 15.4 | <ul style="list-style-type: none"> <li>-7.2% of preterm babies were admitted.</li> <li>-Preterm case fatality rate was 5.4%.</li> <li>-Extremely and very low birth weight babies were 250 times and 47.6 times more likely to die compared to term babies respectively.</li> </ul>                                                                                                                                                           |
| Oluwole et al., 2020    | Nigeria      | Cross-sectional | General population of pregnant women | Hospital                   | 206    | LMP, USS           | NR   | NR                                                                                                                                                                                                                                                                                                                                                                                                                                            |
| Olusanya et al., 2010   | Nigeria      | Cross-sectional | General population of pregnant women | Hospital                   | 4314   | LMP                | 20.0 | NR                                                                                                                                                                                                                                                                                                                                                                                                                                            |
| Omokhodion et al., 2010 | Nigeria      | Cross-sectional | General population of pregnant women | Hospital                   | 1504   | LMP                | 10.0 | NR                                                                                                                                                                                                                                                                                                                                                                                                                                            |
| Onwughara et al., 2020  | South Africa | Cross-sectional | General population of pregnant women | Hospital                   | 1758   | LMP, USS           | 17.0 | NR                                                                                                                                                                                                                                                                                                                                                                                                                                            |
| Osman et al., 2001      | Mozambique   | Cohort          | General population of pregnant women | Hospital                   | 908    | USS                | 15.0 | NR                                                                                                                                                                                                                                                                                                                                                                                                                                            |
| Osungbade et al., 2011  | Nigeria      | Cross-sectional | General population of pregnant women | Hospital                   | 802    | NR                 | 16.0 | NR                                                                                                                                                                                                                                                                                                                                                                                                                                            |
| Padonou et al., 2014    | Benin        | Cross-sectional | General population of pregnant women | Health centres             | 526    | Ballard Score      | 10.0 | NR                                                                                                                                                                                                                                                                                                                                                                                                                                            |

|                           |              |                 |                                      |          |        |                    |      |                                                                                                                                                                                                                                                            |
|---------------------------|--------------|-----------------|--------------------------------------|----------|--------|--------------------|------|------------------------------------------------------------------------------------------------------------------------------------------------------------------------------------------------------------------------------------------------------------|
| Parek et al., 2011        | Botswana     | Cohort          | General population of pregnant women | Hospital | 16,219 | LMP, SFH           | 20.0 | NR                                                                                                                                                                                                                                                         |
| Patel et al., 2017        | Kenya        | Cohort          | Preterm babies admitted              | Hospital | 88     | NR                 | NR   | -All participants were hospitalized preterm babies.<br>-11.4% of preterm babies admitted died.<br>-The mean duration of hospital stay was 37days<br>-The major causes of death were neonatal sepsis (50%), pulmonary hemorrhage (40%), pneumonia (10%)     |
| Rakoto-Alson et al., 2010 | Madagascar   | Cohort          | General population of pregnant women | NR       | 204    | LMP, USS           | 21.0 | NR                                                                                                                                                                                                                                                         |
| Ramdin et al., 2020       | South Africa | Cohort          | Preterm infants                      |          | 56     | LMP, Ballard Score | NR   | -7.1% of preterm infants had developmental disability compared to none in term infants<br>-Developmental outcome, as assessed by the Bayley scales of infant and toddler development, was not different between late preterm infants and comparison peers. |
| Rayco-Solon et al., 2005  | Gambia       | Cohort          | General population of pregnant women | NR       | 1916   | Dubowitz           | 12.0 | NR                                                                                                                                                                                                                                                         |
| Regasa et al., 2021       | Ethiopia     | Case control    | General population of pregnant women | Hospital | 358    | NR                 | NR   | NR                                                                                                                                                                                                                                                         |
| Rugumisa et al., 2020     | Tanzania     | Case control    | General population of pregnant women | Hospital | 222    | LMP                | 17.0 | NR                                                                                                                                                                                                                                                         |
| Saaka et al., 2013        | Ghana        | Cross-sectional | General population of pregnant women |          | 524    | USS                | 7.0  | NR                                                                                                                                                                                                                                                         |
| Sania et al., 2017        | South Africa | Cohort          | HIV positive pregnant women          | NR       | 571    | LMP, USS           | 14.0 | NR                                                                                                                                                                                                                                                         |
| Sania et al., 2015        | Tanzania     | RCT             | HIV negative pregnant women          | NR       | 6664   | LMP                | 15.0 | -Preterm babies were at a higher risk of neonatal mortality (RR=2.6) compared to term babies (RR=2.3).                                                                                                                                                     |

|                        |                              |                 |                                      |                        |        |                    |      |                                                                                                                                   |
|------------------------|------------------------------|-----------------|--------------------------------------|------------------------|--------|--------------------|------|-----------------------------------------------------------------------------------------------------------------------------------|
| Shava et al., 2019     | Botswana                     | Cross-sectional | General population of pregnant women | Hospital               | 66,812 | LMP, USS           | 19.0 | NR                                                                                                                                |
| Siakwa et al., 2020    | Ghana                        | Case control    | General population of pregnant women | Hospital               | 1006   | NR                 | NR   | NR                                                                                                                                |
| Sigalla et al., 2017   | Tanzania                     | Cohort          | General population of pregnant women | Health facility & home | 1112   | USS                | 8.0  | NR                                                                                                                                |
| Soroye et al., 2015    | Tanzania                     | Cross-sectional | General population of pregnant women | Hospital               | 453    | LMP                | 13.0 | NR                                                                                                                                |
| Sow et al., 2018       | Senegal                      | Cross-sectional | General population of pregnant women | Hospital               | 501    | NR                 | 28.0 | NR                                                                                                                                |
| Stewart et al., 2019   | Malawi                       | Cohort          | General population of pregnant women | NR                     | 1006   | USS                | 7.0  | NR                                                                                                                                |
| Stringer et al., 2010  | Malawi<br>Tanzania<br>Zambia | RCT             | HIV Positive pregnant women          | NR                     | 2428   | SFH                | 25.0 | NR                                                                                                                                |
| Suleiman et al., 2010  | Nigeria                      | Cohort          | Preterm babies admitted              | Hospital               | 185    | Ballard score, LMP | NR   | -Participants were hospitalized preterm babies.<br>-12.2% of the hospitalized babies died                                         |
| Sullivan et al., 1999  | Malawi                       | Cohort          | Primigravid pregnant women           | Hospital               | 178    | Dubowitz score     | 19.0 | NR                                                                                                                                |
| Tadese et al., 2020    | Ethiopia                     | Case control    | General population of pregnant women | Hospital               | 414    | NR                 | NR   | NR                                                                                                                                |
| Tamambang et al., 2018 | Cameroon                     | Cross-sectional | General population of pregnant women | Hospital               | 8056   | NR                 | 8.0  | NR                                                                                                                                |
| Tamene et al., 2020    | Ethiopia                     | Cross-sectional | Preterm babies admitted              | Hospital               | 686    | NR                 | NR   | -Participants were hospitalized preterm babies.<br>-36.1% of these babies died<br>-None of the extremely preterm babies survived. |
| Teklay et al., 2018    | Ethiopia                     | Case control    | General population of pregnant women | Hospital               | 264    | NR                 | NR   | NR                                                                                                                                |



|                            |              |                 |                                      |                                                              |        |                         |      |                                                 |
|----------------------------|--------------|-----------------|--------------------------------------|--------------------------------------------------------------|--------|-------------------------|------|-------------------------------------------------|
| Tembo et al., 2020         | Zambia       | Cohort          | General population of pregnant women | Home and hospital                                            | 11,501 | NR                      | 5.0  | NR                                              |
| Ticconi et al., 2003       | Zimbabwe     | Cohort          | General population of pregnant women | Hospital                                                     | 986    | LMP                     | 29.0 | NR                                              |
| Turton et al., 2017        | South Africa | Cohort          | General population of pregnant women | NR                                                           | 443    | NR                      | 32.0 | NR                                              |
| Ugochukwu et al., 2002     | Nigeria      | Cohort          | Babies admitted                      | NR                                                           | 699    | Dubowitz                | NR   | NR                                              |
| Umeora et al., 2004        | Nigeria      | Case control    | General population of pregnant women | Hospital                                                     | 261    | NR                      | 6.0  | NR                                              |
| Uwambaye et al., 2021      | Rwanda       | Case control    | General population of pregnant women | NR                                                           | 555    | NR                      | NR   | NR                                              |
| Van den Broek et al, 2005  | Malawi       | Cohort          | General population of pregnant women | 53.2% hospital or health centre, 39.2% home and 7.5%-TBA hut | 453    | USS                     | 20.0 | NR                                              |
| Van Den Broek et al., 2014 | Malawi       | Cohort          | General population of pregnant women | Health centre, hospital, home                                | 2149   | USS                     | 16.0 | NR                                              |
| Van der Merwe et al., 2011 | South Africa | Cohort          | HIV Positive pregnant women          | NR                                                           | 1093   | LMP, USS, SFH           | 13.0 | NR                                              |
| Van zyl et al., 2018       | South Africa | Cohort          | Pregnant women with diabetes         | Hospital                                                     | 725    | USS                     | 33.0 | NR                                              |
| Wagura et al., 2018        | Kenya        | Cross-sectional | General population of pregnant women | Hospital                                                     | 322    | Finnstrom score         | 18.0 | NR                                              |
| Wakeyo et al., 2020        | Ethiopia     | Case control    | General population of pregnant women | Hospital                                                     | 244    | LMP, USS                | NR   | NR                                              |
| Watson-Jones et al., 2007  | Tanzania     | Cohort          | General population of pregnant women | Hospital                                                     | 1688   | USS                     | 12.0 | NR                                              |
| Woday et al., 2019         | Ethiopia     | Case control    | General population of pregnant women | Hospital                                                     | 417    | LMP, USS, Ballard score | NR   | NR                                              |
| Yismaw et al., 2018        | Ethiopia     | Cross-sectional | Preterm babies admitted              | Home (4.5%), Health center                                   | 516    | NR                      | NR   | -Participants were hospitalized preterm babies. |

[illegible]
